# Supplementary material for: Quantitative Transcriptome Analysis of Purified Equine Mast Cells Identifies a Dominant Mucosal Mast Cell Population with Possible Inflammatory Functions in Airways of Asthmatic Horses
Source: MDPI journal article supplement (doi:10.3390/ijms232213976), 2022-11-12
Supplement: s1 [file s1]

## Supplementary Figures and Tables

**Figure S1.**

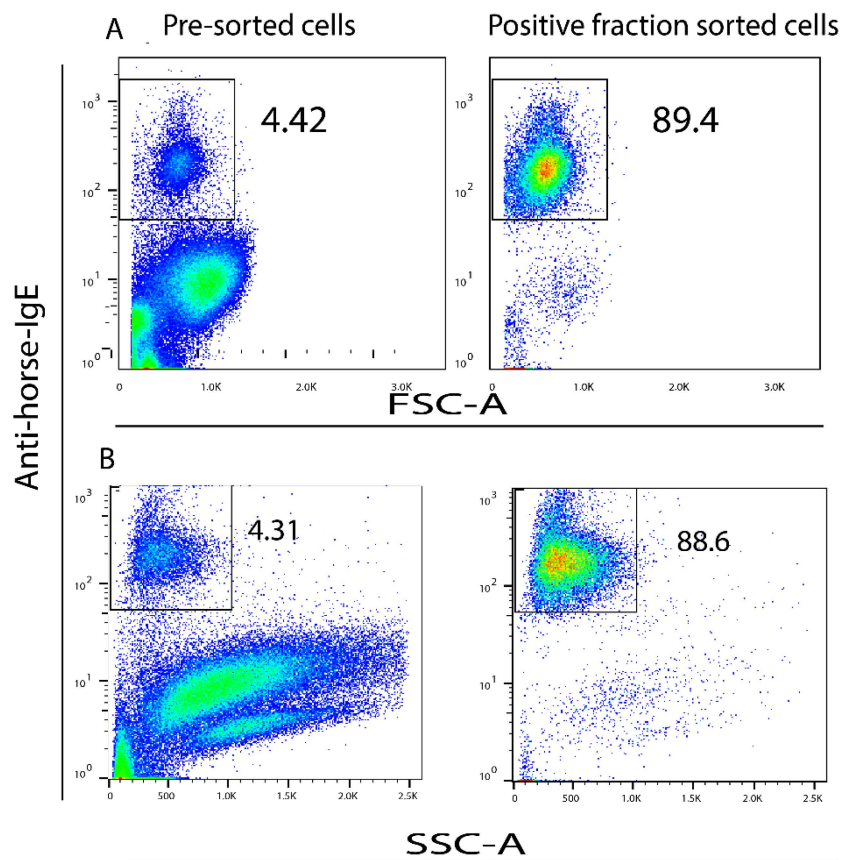

**Figure S1.** Presorted BALF cells and IgE-positive sorted BALF cells, including the forward scatter (FSC) and the side scatter (SSC). Analysis of anti-horse IgE-positive cells in BALF collected from an asthmatic horse using flow cytometry. In (A), IgE-positive cells (y-axis) with forward scatter (x-axis) and in (B), IgE-positive cells (y-axis) with side scatter (x-axis) are shown.

**Figure S2.**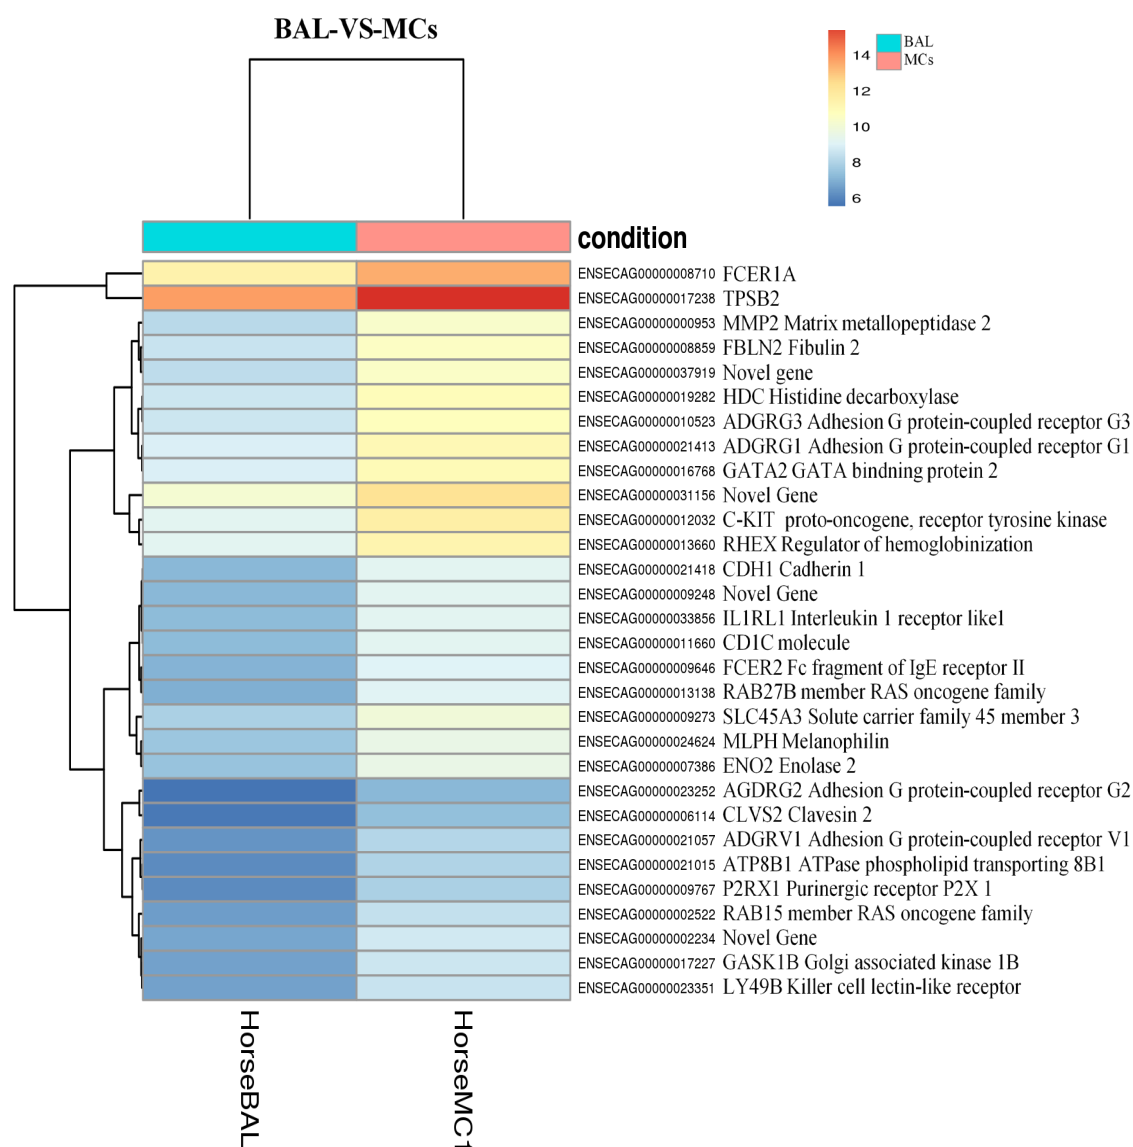

**Figure S2.** Bi-clustering heat map illustrating RNA-seq differential expression. These data come from the Dseq2 analysis of RNA-Seq data from total BALF cells (BAL) and isolated BALF MCs (MCs), which sorted the top 30 genes by their adjusted p-values. The colored legend indicates the condition (BAL or MCs) and the relative expression level.

**Table S1.**Antibodies tested for cross reactivity with horse BALF MCs.<sup>a</sup>

| <b>Target molecule</b> | <b>Target species</b> | <b>Fluorochrome</b> | <b>Monoclonal antibody clone</b> | <b>Company</b>   |
|------------------------|-----------------------|---------------------|----------------------------------|------------------|
| <b>CD117(c-kit)</b>    | Human                 | PC7                 | 104D2                            | eBioscience      |
| <b>CD117(c-kit)</b>    | Mouse                 | PC7                 | 2B8                              | eBioscience      |
| <b>CD117(c-kit)</b>    | Mouse                 | APC                 | REA791                           | Miltenyi Biotec. |
| <b>FcεRI alpha</b>     | Human                 | PE                  | AER-37 (CRA1)                    | eBioscience      |
| <b>FcεRI alpha</b>     | Mouse                 | PE                  | MAR-1                            | eBioscience      |

<sup>a</sup> List of monoclonal antibodies with low or no cross-reactive binding to horse BALF MCs, as determined by flow cytometry or MACS Quant Analyzer 10, using standard staining protocol.

**Table S2.** The most highly expressed genes from total horse BALF cells and from the three mast cell isolates MC1, MC2 and MC3. The top genes are ordered based on the top 100 genes in the MC1 isolate. The information was obtained from the common data analysis outlined in the Materials and Methods section.

|                     | BALF cells<br>(BALF sample 2) | MC1<br>(BALF sample 2) | MC2<br>(BALF sample 1) | MC3<br>(BALF sample 3) |
|---------------------|-------------------------------|------------------------|------------------------|------------------------|
| Top expressed genes |                               |                        |                        |                        |
| MT-CO1              | 29413.5831                    | 41009.1666             | 27099.2988             | 95190.1416             |
| MT-ATP6             | 11027.9631                    | 20065.8006             | 12617.394              | 55115.6967             |
| DRA                 | 2344.3269                     | 17906.9565             | 6758.9479              | 814.0243               |
| B2M                 | 18367.325                     | 16219.7819             | 12477.8917             | 6740.4678              |
| CD74                | 3531.8286                     | 14764.8062             | 8191.8529              | 3494.6934              |
| MT-ATP8             | 7202.0129                     | 14661.4489             | 11414.0884             | 39015.4558             |
| RPL37A              | 15444.3893                    | 14616.6087             | 19607.7078             | 14350.7986             |
| EEF1A1              | 4932.6501                     | 9153.7189              | 10821.1493             | 8298.1784              |
| TMSB4X              | 14808.5944                    | 8951.0373              | 10425.9505             | 5240.0155              |
| MT-CO2              | 11613.9032                    | 8692.1977              | 5516.7553              | 22271.0356             |
| FTH1                | 28251.8119                    | 8277.1777              | 8023.8046              | 3655.4044              |
| LGALS1              | 3867.4844                     | 8205.7717              | 12901.8045             | 14845.4957             |
| MT-ND1              | 3227.3398                     | 7426.821               | 2843.3627              | 16742.5698             |
| FTL                 | 26772.8437                    | 7208.7006              | 5512.6043              | 2124.792               |
| RPS11               | 7231.2483                     | 7173.8105              | 7403.1054              | 6567.1426              |
| RPL13A              | 6702.7727                     | 7066.2215              | 8088.914               | 6311.8633              |
| MT-ND2              | 2540.6652                     | 6246.2846              | 2795.6178              | 14609.7667             |
| CST3                | 565.8169                      | 6198.487               | 5139.6812              | 3753.9848              |
| SRGN                | 4555.2375                     | 5957.7922              | 7377.9738              | 5935.9011              |
| RPS28               | 5480.1159                     | 5501.0031              | 6117.2277              | 5380.4986              |
| MT-ND3              | 2812.6265                     | 5484.7986              | 3701.9221              | 8648.0827              |
| RPS9                | 4777.3894                     | 5255.437               | 5950.6155              | 5727.4605              |
| RPS2                | 5253.7852                     | 5056.2227              | 5048.0988              | 3712.9393              |
| RPS29               | 4893.9921                     | 5008.0098              | 7292.4365              | 4416.6278              |
| RPL10               | 3755.7658                     | 4977.8132              | 5997.076               | 5464.4795              |
| MT-CYB              | 2298.6732                     | 4713.5753              | 2031.3286              | 9808.3338              |
| UBA52               | 3602.4615                     | 4497.7648              | 3728.1857              | 3216.5139              |
| APOE                | 22183.6157                    | 4363.3079              | 3730.7079              | 1039.7364              |
| MT-CO3              | 4074.6711                     | 4312.2402              | 578.6597               | 9887.2979              |
| RPS14               | 3983.8774                     | 4263.1371              | 4630.9873              | 4564.1478              |
| RPS16               | 4611.7064                     | 4101.4146              | 4329.3582              | 4211.8415              |
| VIM                 | 4574.4093                     | 4019.0991              | 5280.8344              | 4524.5363              |
| ACTG1               | 4181.5759                     | 4008.654               | 5041.1043              | 2687.4894              |
| RPS23               | 2673.7217                     | 4003.7441              | 5152.8207              | 5574.0417              |
| RPL24               | 2882.4662                     | 3952.8284              | 5398.3504              | 4987.7278              |
| RPL35               | 3853.2129                     | 3939.0645              | 4299.2906              | 4671.583               |
| RPL37               | 3668.1705                     | 3845.9311              | 4374.1342              | 3654.1183              |
| RPLP0               | 3450.0812                     | 3838.5416              | 4226.6212              | 4232.5212              |
| IFI27               | 10106.4941                    | 3629.8768              | 967.7666               | 792.4141               |
| FAU                 | 3488.2681                     | 3479.0595              | 3845.0613              | 3587.8349              |

|         |           |           |           |           |
|---------|-----------|-----------|-----------|-----------|
| S100A4  | 1729.0353 | 3440.9262 | 6989.8292 | 7416.6548 |
| RPS18   | 3262.8067 | 3410.7624 | 4062.7394 | 4066.3344 |
| FCER1G  | 4710.4727 | 3387.2476 | 4240.6801 | 3591.4607 |
| RPLP2   | 3327.3652 | 3370.5983 | 4166.4964 | 3546.4082 |
| S100A11 | 2213.1348 | 3321.423  | 5787.0891 | 7670.9381 |
| SYNGR2  | 1417.3198 | 3269.6095 | 2013.0855 | 1294.5899 |
| RPS20   | 3168.4932 | 3248.8483 | 3396.3771 | 3636.7394 |
| RPS26   | 2763.0711 | 3177.2914 | 3940.0881 | 3879.0775 |
| ATP6V0C | 5436.6992 | 3114.7646 | 2081.1349 | 1494.818  |
| RPL31   | 2891.9624 | 3106.2985 | 3268.5299 | 3954.6219 |
| IFI6    | 6808.9499 | 3035.3798 | 1261.044  | 541.9207  |
| CYBA    | 6712.6237 | 3018.2843 | 2727.233  | 2618.1918 |
| DQB     | 375.5303  | 2988.1509 | 418.3969  | 170.0539  |
| CFL1    | 3523.2583 | 2975.4907 | 3444.1669 | 2629.8609 |
| RPL7A   | 2243.6883 | 2950.3936 | 3473.3953 | 3638.8958 |
| RPL13   | 1862.8981 | 2864.5135 | 3669.9886 | 3936.0674 |
| RPS8    | 2789.2536 | 2861.5281 | 3535.18   | 3135.3605 |
| LAPTM5  | 1790.5406 | 2824.9612 | 3710.8036 | 3114.6403 |
| RPL39   | 3540.0233 | 2796.6998 | 2607.1654 | 2000.3933 |
| CXCL16  | 1694.0473 | 2795.8787 | 998.0995  | 584.6483  |
| RPS3    | 2226.4006 | 2782.9088 | 3936.3393 | 2225.5551 |
| RACK1   | 1874.8985 | 2780.9184 | 3351.659  | 2826.4767 |
| IFI30   | 790.0586  | 2753.2704 | 1491.6262 | 743.0892  |
| PSAP    | 7299.2739 | 2731.4587 | 1889.8737 | 518.1595  |
| RPS21   | 2983.3361 | 2724.9936 | 3862.9793 | 2353.7604 |
| PFN1    | 3345.8616 | 2688.7848 | 2787.8975 | 2728.9845 |
| RPL18A  | 2876.9272 | 2667.6188 | 2440.3474 | 1850.2689 |
| RPL7    | 1667.6187 | 2652.5088 | 4421.0739 | 3791.1485 |
| TYROBP  | 4206.2112 | 2647.7416 | 1977.8724 | 1383.3962 |
| RPS15A  | 2724.0433 | 2641.5977 | 2680.9502 | 2460.9648 |
| RPS6    | 2064.7755 | 2511.6073 | 3187.4761 | 3360.1335 |
| RPL10A  | 2201.2484 | 2473.5673 | 2875.8551 | 2925.8774 |
| RPL26   | 2102.6235 | 2462.0736 | 3145.9747 | 3044.8894 |
| BANF1   | 2570.2588 | 2433.6456 | 2485.7911 | 1967.6654 |
| LTC4S   | 109.4815  | 2413.6191 | 4507.9367 | 4301.0991 |
| RPS3A   | 1301.0475 | 2398.3456 | 2920.6022 | 2279.0671 |
| RPL27A  | 2106.2484 | 2396.9132 | 3247.9305 | 2316.4724 |
| RPL18   | 2588.0829 | 2386.9458 | 2512.42   | 2152.2005 |
| ACTB    | 3374.6002 | 2386.1525 | 3427.2546 | 2265.7028 |
| GABARAP | 1782.6863 | 2364.9933 | 2553.4443 | 1894.6148 |
| UBB     | 2183.8752 | 2357.6283 | 2621.4363 | 1917.7659 |
| H3-3B   | 1386.157  | 2339.7332 | 2765.2267 | 1668.6622 |
| RPS13   | 1973.9772 | 2317.5161 | 3123.1092 | 2124.4465 |
| RPSA    | 2984.189  | 2252.3091 | 2075.9447 | 1595.0746 |
| RPL38   | 2241.3072 | 2229.8482 | 2467.3981 | 1769.8209 |
| RPL9    | 1831.2817 | 2229.7961 | 3012.0091 | 1823.0029 |
| RNASE6  | 3962.4337 | 2193.4279 | 835.5649  | 166.4551  |
| MYL6    | 3237.489  | 2189.4647 | 3120.9925 | 2976.3022 |

|         |           |           |           |           |
|---------|-----------|-----------|-----------|-----------|
| ALOX5AP | 1887.7095 | 2174.9508 | 2890.2818 | 2307.23   |
| RPL27   | 2175.7931 | 2167.9698 | 2732.5585 | 2797.2952 |
| RPS25   | 1859.6021 | 2153.0814 | 2829.9172 | 2580.5886 |
| LY6E    | 3035.4682 | 2143.0504 | 2284.1401 | 1428.5346 |
| RPS7    | 1839.4933 | 2102.3407 | 2652.7107 | 2112.2468 |
| RPL14   | 1605.9125 | 2083.8305 | 3123.6833 | 2753.2739 |
| RPL3    | 1518.4701 | 2051.3819 | 2180.7268 | 1960.9311 |
| RPL19   | 1867.1773 | 2036.1283 | 2634.2234 | 2777.0474 |
| TPT1    | 2328.544  | 2006.6031 | 2379.8926 | 1551.6285 |
| DRB     | 378.8709  | 1990.7242 | 685.249   | 198.2401  |
| RPL8    | 1744.6062 | 1919.9396 | 2167.1875 | 1944.1248 |
| RPL28   | 2325.6156 | 1855.9381 | 2057.0447 | 2182.6842 |

**Table S3.**

Transcript levels for additional important MC-expressed genes. The number of normalized counts (TPM) was given for each gene (obtained from GENEWIZ).

| <b>Gene</b> | <b>BALF<br/>MCs</b> | <b>Total<br/>BALF<br/>cells</b> | <b>Functions</b>                                                                                                                         |
|-------------|---------------------|---------------------------------|------------------------------------------------------------------------------------------------------------------------------------------|
| FBLN2       | 45                  | 1                               | Tissue development and remodeling (Extra cellular matrix glycol protein)                                                                 |
| ECE1        | 17                  | 1                               | Proteolytic processing of endothelin-1,2 and 3                                                                                           |
| ENO2        | 101                 | 1.1                             | Glucose metabolism                                                                                                                       |
| ANXA3       | 49                  | 1.7                             | Regulation of cellular growth and in signal transduction pathways                                                                        |
| ADGRG3      | 178                 | 3                               | Involved in G protein-coupled receptor signaling pathway and regulation of cell migration                                                |
| MT3         | 49                  | 3                               | It plays an important role in zinc and copper homeostasis, and is induced under hypoxic conditions,                                      |
| IGFBP7      | 139                 | 4                               | Regulate the IGF availability in body fluids and tissues                                                                                 |
| CASP6       | 61                  | 5                               | Apoptosis                                                                                                                                |
| RGS13       | 136                 | 6                               | Regulator of G-protein signaling 13                                                                                                      |
| PLPP1       | 62                  | 6                               | Synthesis of glycolipids and in phospholipase D-mediated signal transduction,                                                            |
| ZFR2        | 58                  | 9                               | Zinc finger RNA binding protein 2                                                                                                        |
| LAPTM4<br>B | 117                 | 9                               | Regulation of lysosomal membrane permeability; and regulation of lysosome organization                                                   |
| RHEX        | 523                 | 13                              | Acts as a signaling transduction factor of the EPO-EPOR signaling pathway promoting erythroid cell differentiation                       |
| MAP4K1      | 73                  | 18                              | Involved in several processes, including JNK cascade; cellular response to phorbol 13-acetate 12-myristate; and protein phosphorylation. |
| HMGCR       | 176                 | 27                              | The rate-limiting enzyme for cholesterol synthesis                                                                                       |
| ICMA2       | 164                 | 28                              | This protein may play a role in lymphocyte recirculation by blocking LFA-1-dependent cell adhesion                                       |
| LYL1        | 71                  | 28                              | Hematopoiesis                                                                                                                            |
| SQLE        | 134                 | 29                              | Catalyzes the first oxygenation step in sterol biosynthesis                                                                              |
| ITGAE       | 185                 | 30                              | The chief ligand for $\alpha E\beta 7$ is E-cadherin, a cellular adhesion molecule (CAM) found on epithelial cells                       |
| FDPS        | 168                 | 46                              | Catalyzes the production of geranyl pyrophosphate and farnesyl pyrophosphate from isopentenyl                                            |
| SERINC3     | 153                 | 48                              | Predicted to enable L-serine transmembrane transporter activity,                                                                         |
| LAT2        | 166                 | 48                              | Involved in FCER1(high affinity immunoglobulin epsilon receptor)-mediated signaling in mast cells                                        |

|       |     |    |                                                      |
|-------|-----|----|------------------------------------------------------|
| ITGB7 | 155 | 53 | Interact with ITGAE and EED                          |
| LAT   | 630 | 89 | Signaling, T-cell, NK cell and mast cell development |

**Table S4.**

Transcript levels for the S100 family genes. The number of normalized counts (TPM) was given for each gene (obtained from GENEWIZ).

|                                      | Gene    | BALF MCs | Total BALF cells |
|--------------------------------------|---------|----------|------------------|
| <b>S100 family genes<sup>a</sup></b> | S100A4  | 3440     | 1729             |
|                                      | S100A11 | 3321     | 2213             |
|                                      | S100A10 | 1130     | 1157             |
|                                      | S100P   | 1625     | 8969             |
|                                      | S100A6  | 753      | 506              |

<sup>a</sup>A family of calcium-binding cytosolic proteins.

**Table S5.**

Transcript levels for the FKBP family of genes. The number of normalized counts (TPM) was given for each gene (obtained from GENEWIZ).

|                                      | Gene  | BALF MCs | Total BALF cells |
|--------------------------------------|-------|----------|------------------|
| <b>FKBP Family genes<sup>a</sup></b> | FKBP8 | 224      | 238              |
|                                      | FKBP2 | 143      | 159              |
|                                      | FKBP4 | 67       | 46               |
|                                      | FKBP3 | 44       | 36               |
|                                      | FKBP5 | 44       | 27               |

<sup>a</sup>Immunophilins consist of a family of highly conserved proteins binding with immunosuppressive drugs.

**Table S6.**

Transcript levels for CD molecules. The number of normalized counts (TPM) was given for each gene (obtained from GENEWIZ).

|                                 | Gene | BALF MCs | Total BALF cells |
|---------------------------------|------|----------|------------------|
| <b>CD molecules<sup>a</sup></b> | CD4  | 156      | 111              |
|                                 | CD9  | 597      | 131              |
|                                 | CD22 | 15       | 1                |
|                                 | CD37 | 781      | 706              |
|                                 | CD53 | 766      | 984              |
|                                 | CD81 | 302      | 124              |
|                                 | CD83 | 446      | 50               |
|                                 | CD96 | 38       | 18               |
|                                 | CD99 | 636      | 516              |

<sup>a</sup>Cell surface proteins
